# Supplementary material
Source: PubMed Central journal article supplement (PMC5669635)

No Transfer

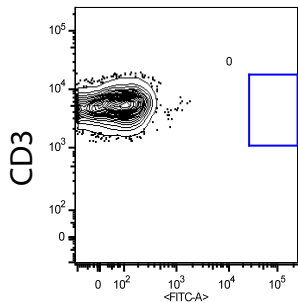

Transferred OT-1 cells

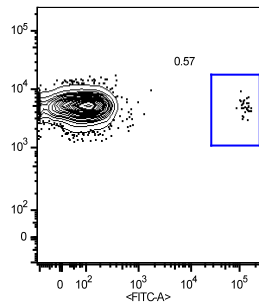

CFSE

Supplement: supp_jlb.1A1116-463RR_Supplemental_Figure.pdf [file supp_jlb.1A1116-463RR_Supplemental_Figure.pdf]
